# Supplementary figures and images for: Diagnosing gestational diabetes
Source: Springer Nature journal article supplement (doi:10.1007/s00125-010-2005-4), 2011-01-03

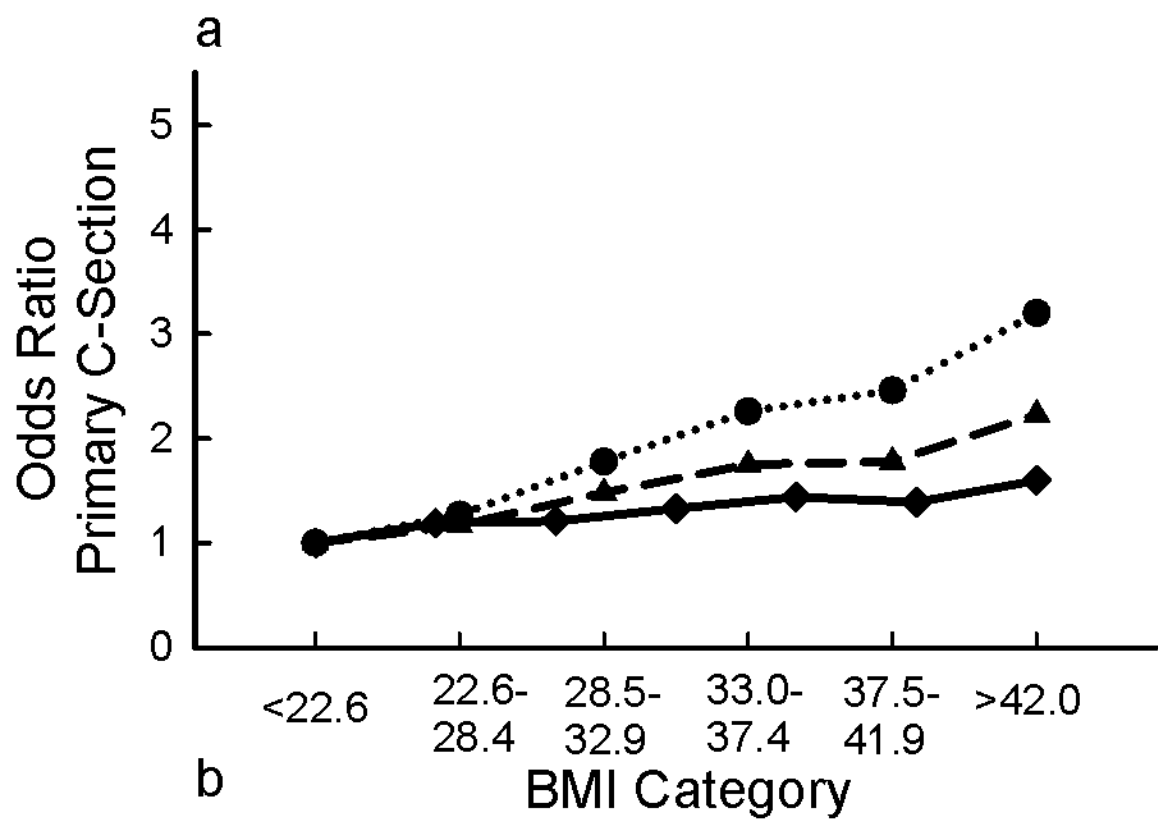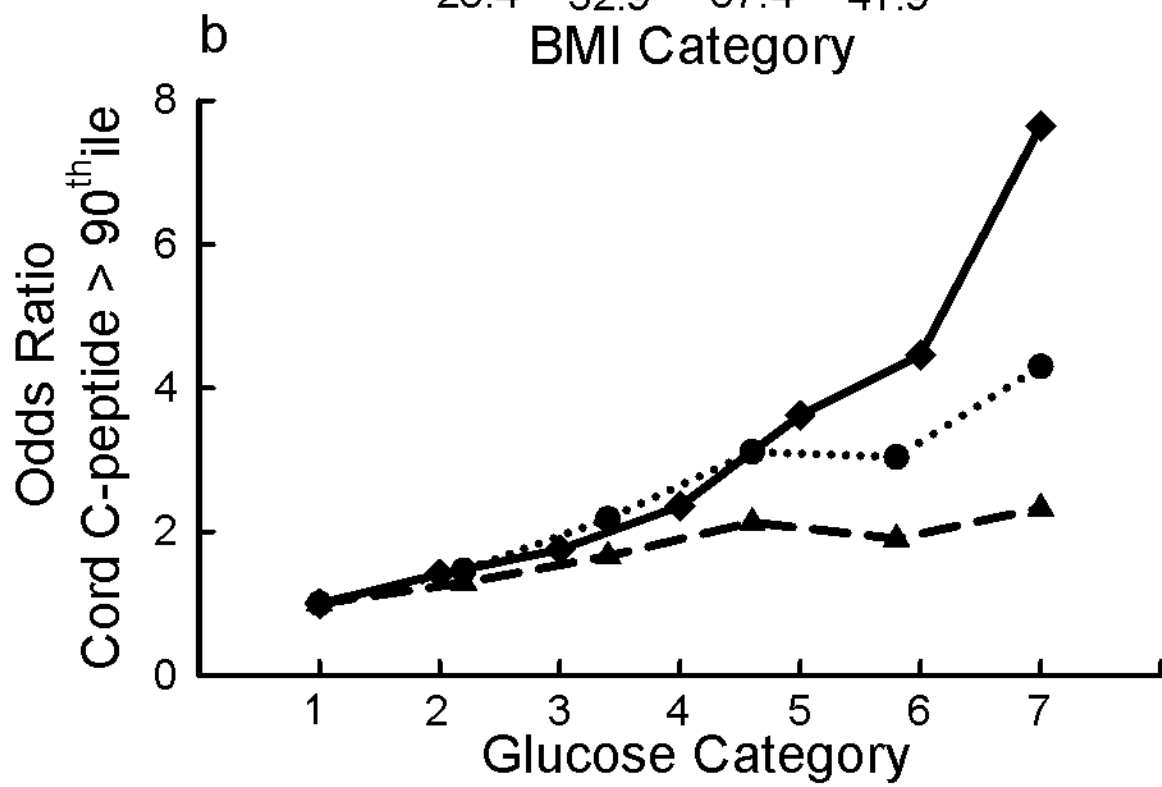

Supplement: MOESM1 [file 8089712]

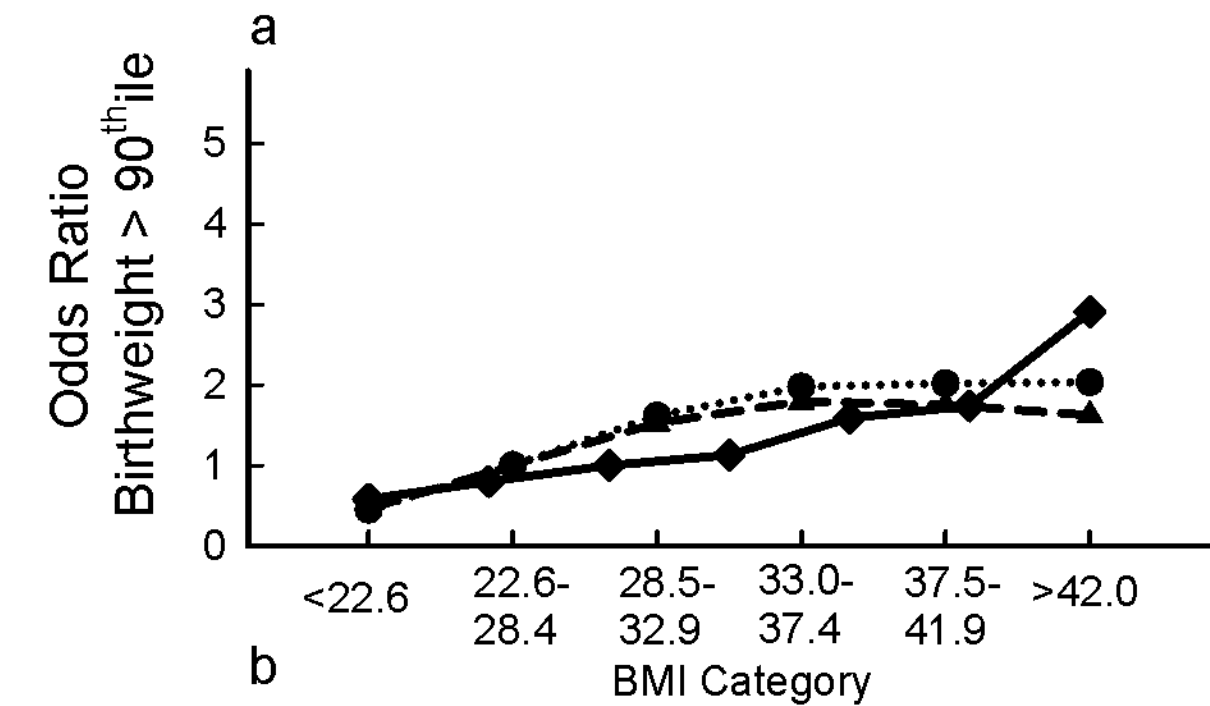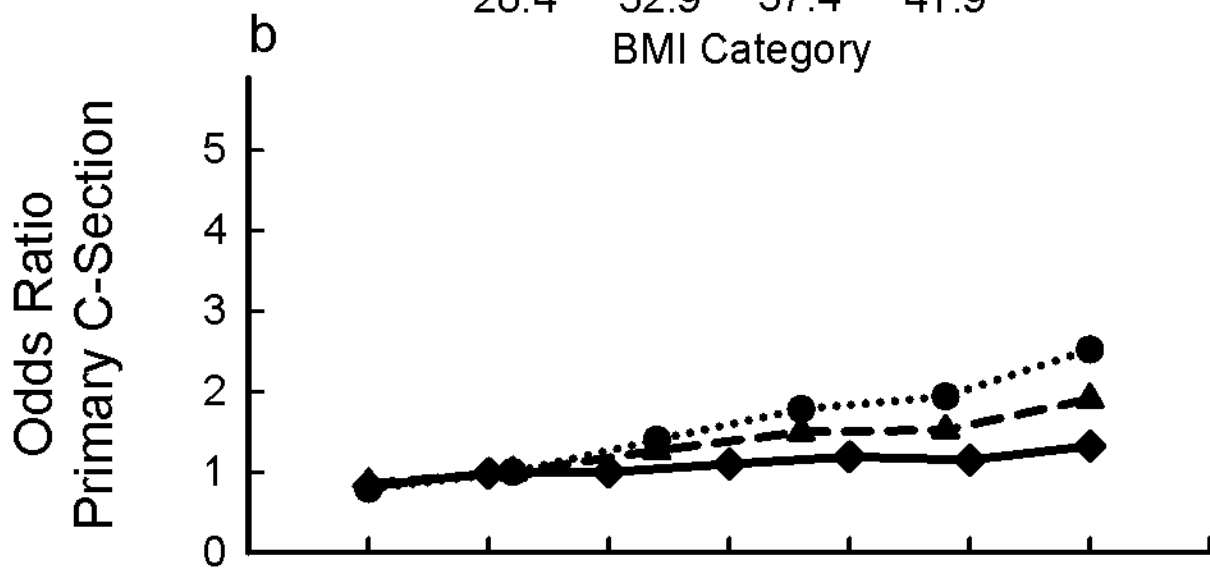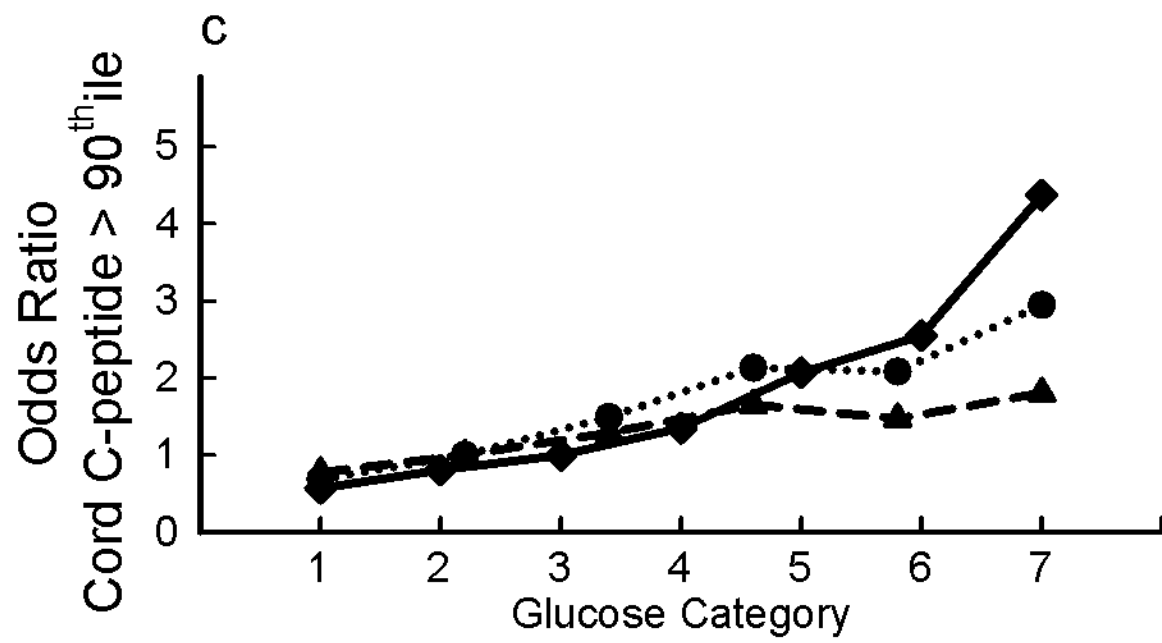

Supplement: MOESM2 [file 8089712]

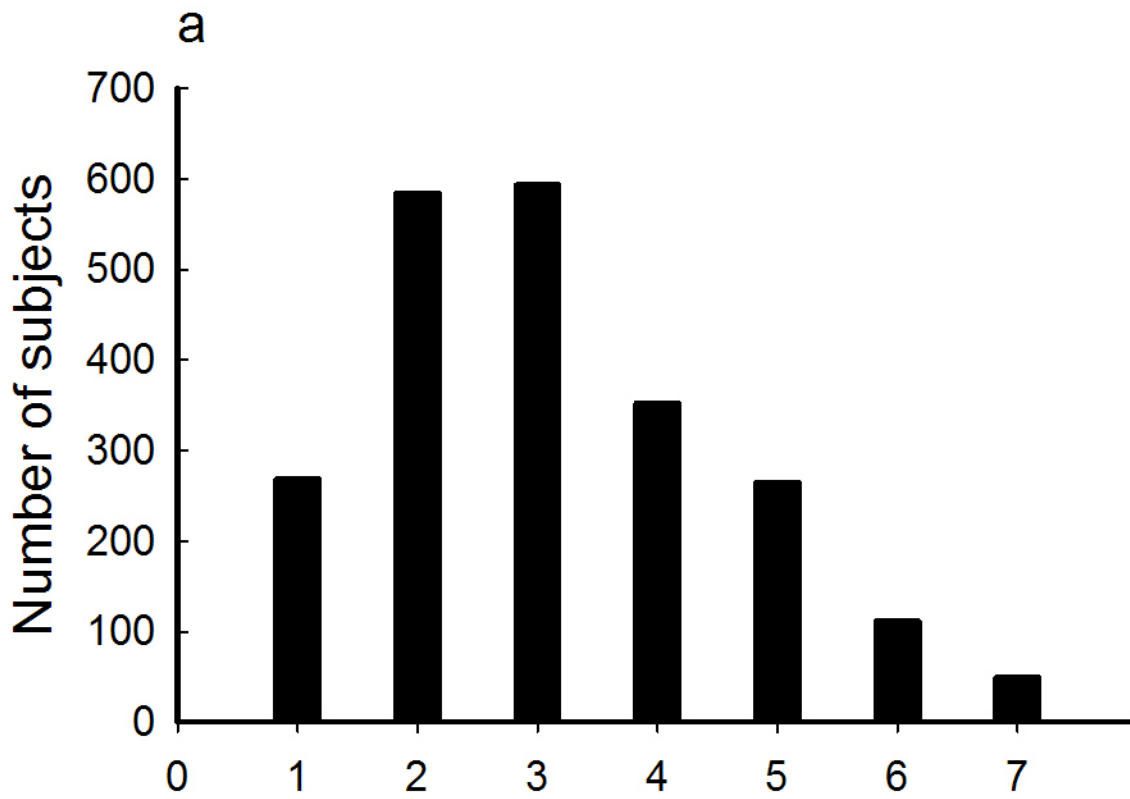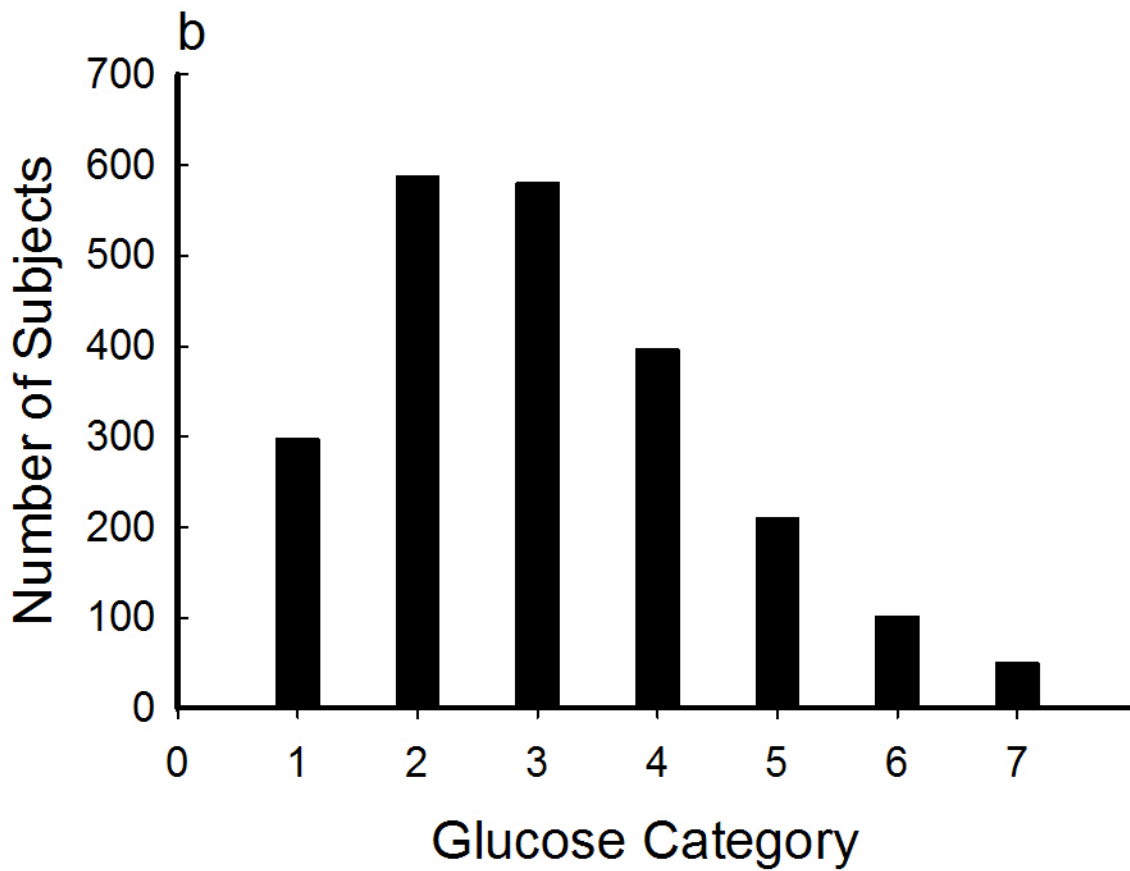

Supplement: MOESM3 [file 8089712]
